# Supplementary material for: Porphyrin(2.1.2.1) organopalladium complexes as efficient singlet oxygen sensitizers
Source: Royal Society of Chemistry journal article supplement (doi:10.1039/d4dt00143e), 2024-01-01
Supplement: d4dt00143e1.pdf [file d4dt00143e1.pdf]

*Electronic Supplementary Information*

**Porphyrin(2.1.2.1) Organopalladium Complexes as Efficient  
Singlet Oxygen Sensitizers**

Xiaojuan Lv,<sup>a</sup> Yuting Dong,<sup>a</sup> Jinrong Wu,<sup>a</sup> Tao Jiang,<sup>a</sup> Feng Chen,<sup>\*,a</sup> Tao Zhang,<sup>a</sup> Fengxian Qiu,<sup>a</sup>  
Songlin Xue<sup>\*,a,b</sup>

<sup>a</sup> School of Chemistry and Chemical Engineering, Jiangsu University, 301 Xuefu Road, Zhenjiang  
212013, China

<sup>b</sup> Key Laboratory of Functional Molecular Solids, Ministry of Education, Anhui Normal University,  
Wuhu 241000, China

Corresponding author:

\*E-mail: fengjchen@ujs.edu.cn (F. C); slxue@ujs.edu.cn (SL. X)

## **Table of Contents**

1. Supporting figures and tables
2. Crystal data
3. Cartesian coordinates

## 1. Supporting figures and tables

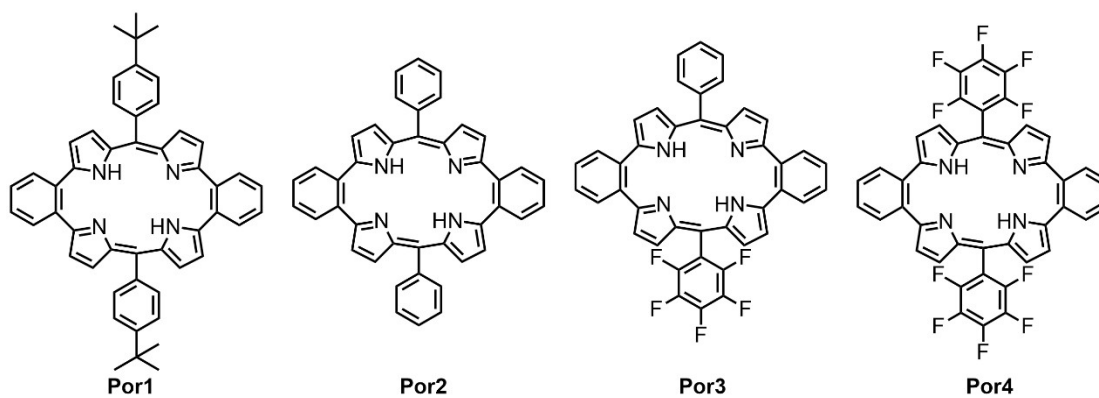

**Figure S1.** Molecular structures of **Por1-Por4**.

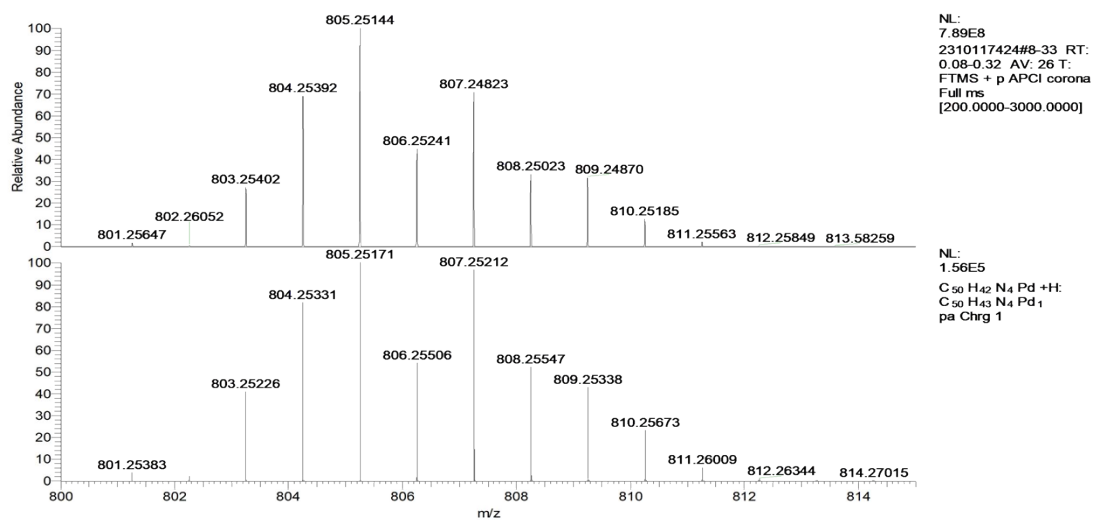

**Figure S2.** HR-APCI-MS spectrum of Pd1.

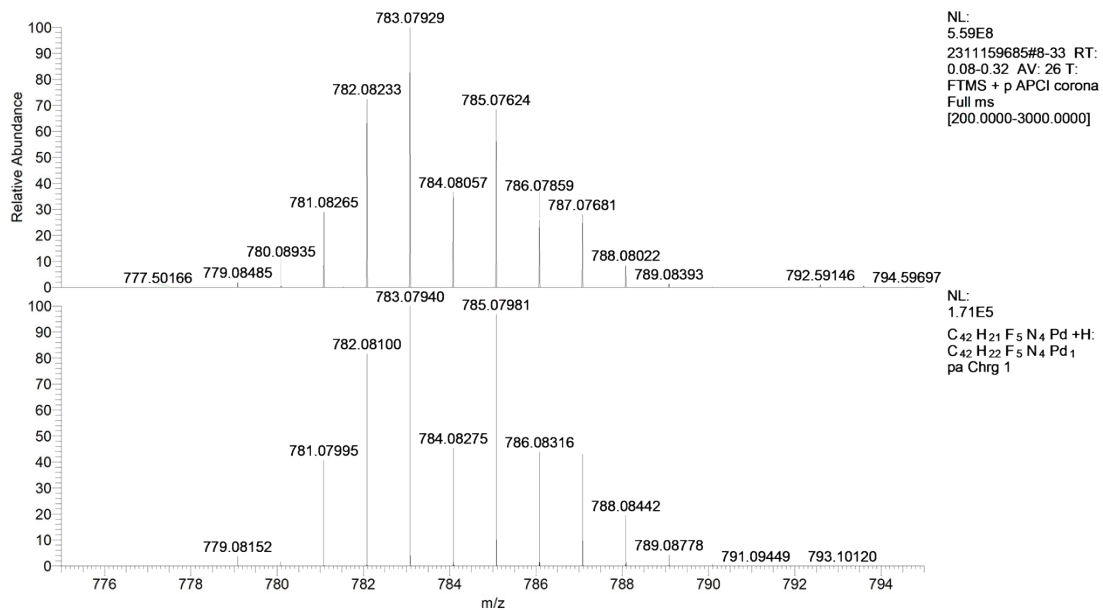

**Figure S3.** HR-APCI-MS spectrum of Pd3.

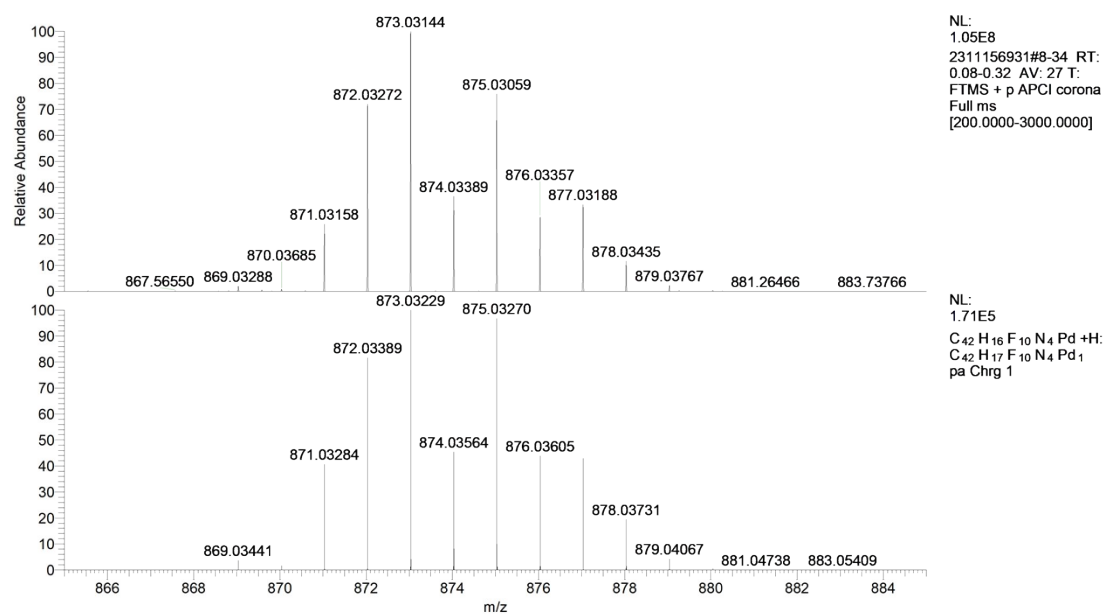

Figure S4. HR-APCI-MS spectrum of Pd4.

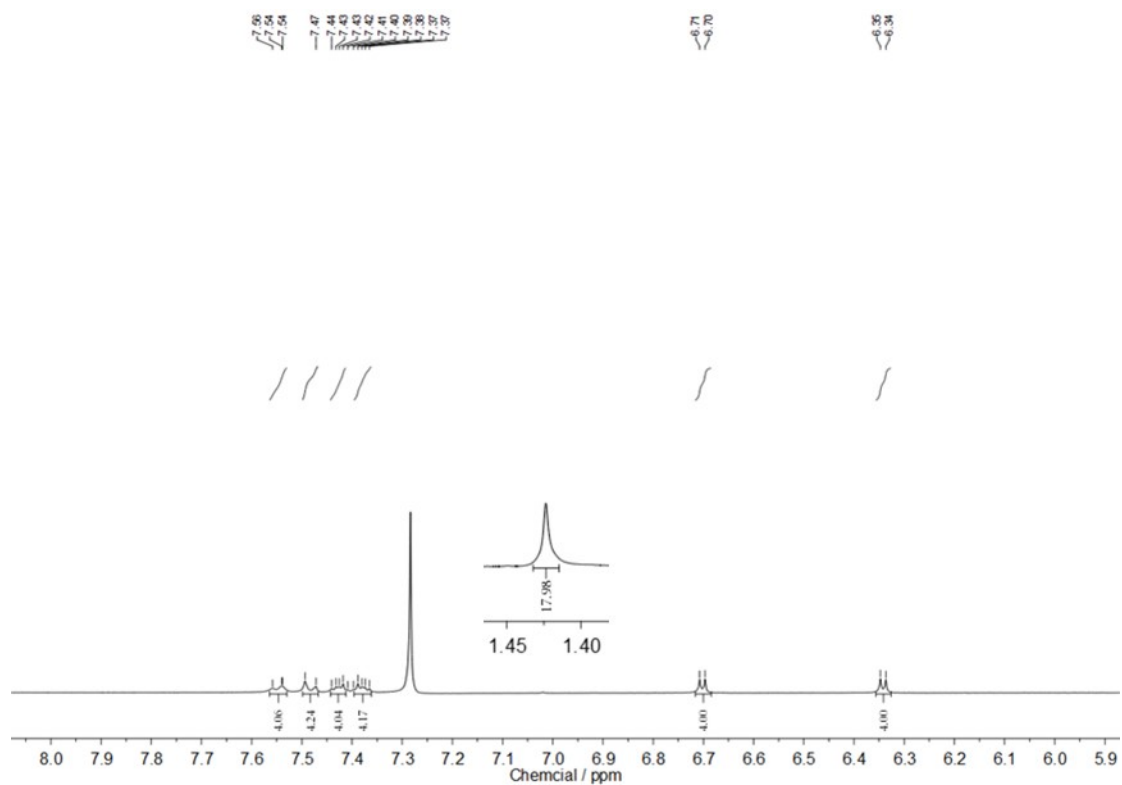

**Figure S5.**  $^1\text{H}$  NMR spectrum of **Pd1** recorded at 298 K in  $\text{CDCl}_3$ .

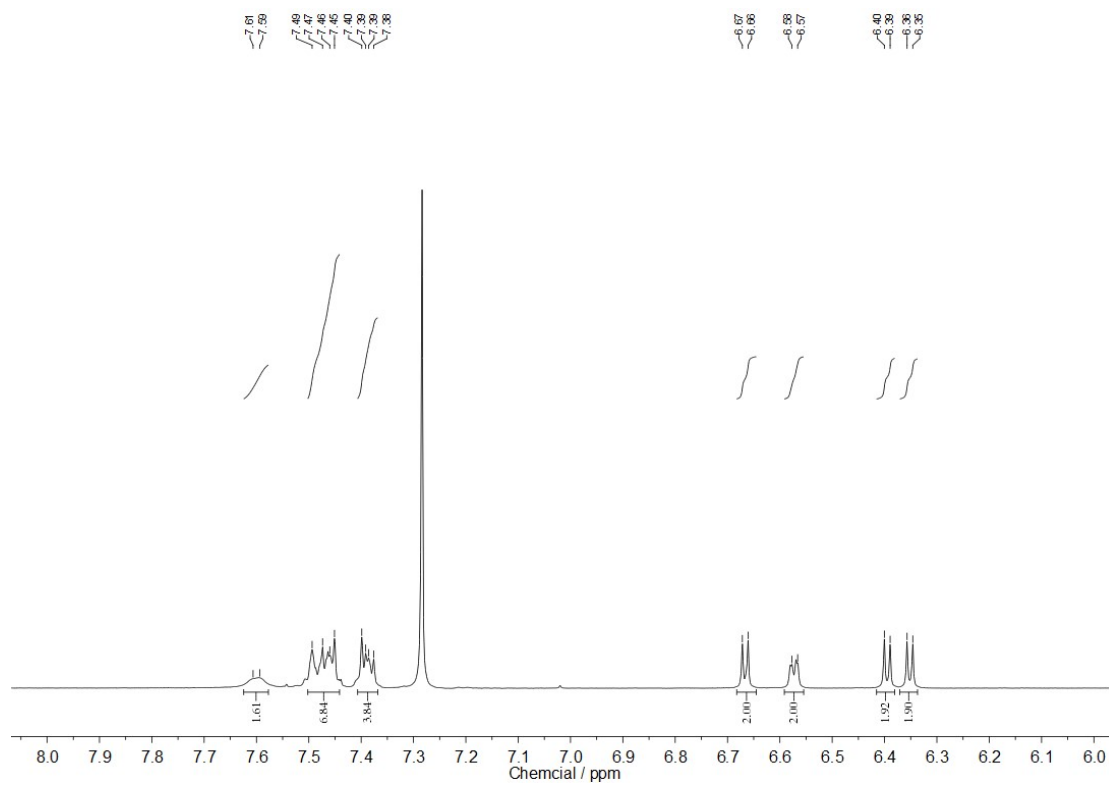

**Figure S6.**  $^1\text{H}$  NMR spectrum of **Pd3** recorded at 298 K in  $\text{CDCl}_3$ .



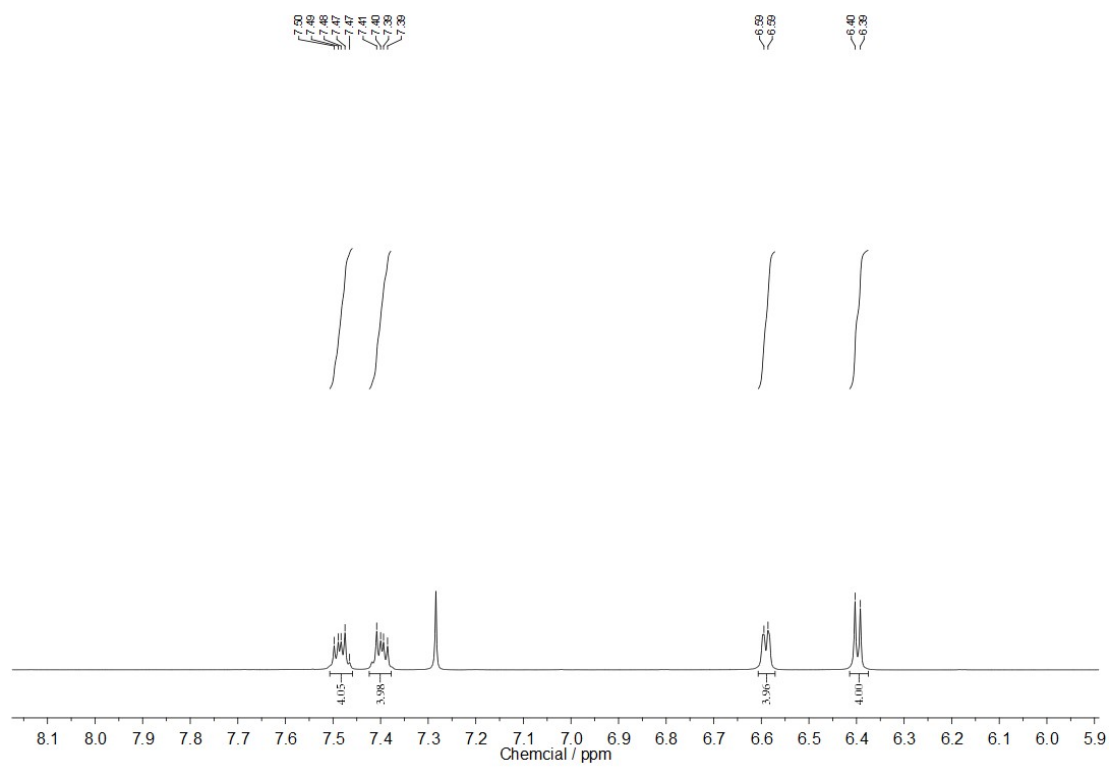

**Figure S7.** <sup>1</sup>H NMR spectrum of **Pd4** recorded at 298 K in CDCl<sub>3</sub>.

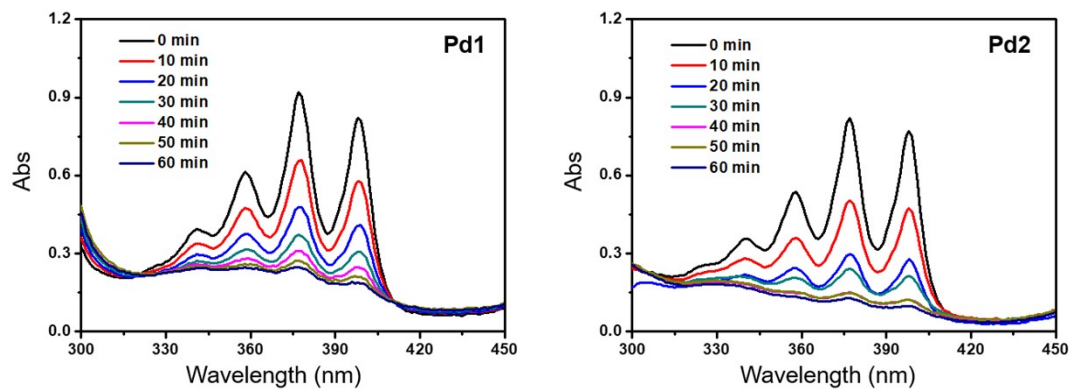

**Figure S8.** Obtained absorption spectra to calculate singlet oxygen quantum yields of **Pd3** and **Pd4** in acetonitrile.

**Table S1.** Singlet oxygen quantum yields ( $\Phi$ ) of Pd complexes by comparison with the  $[\text{Ru}(\text{bpy})_3]\text{Cl}_2$  under blue light irradiation.

| Complexes                        | $\Phi (^1\text{O}_2)$ |
|----------------------------------|-----------------------|
| $[\text{Ru}(\text{bpy})_3]^{2+}$ | 0.57                  |
| <b>Pd4</b>                       | 0.54                  |
| <b>Pd3</b>                       | 0.56                  |
| <b>Pd2</b>                       | 0.42                  |
| <b>Pd1</b>                       | 0.41                  |

## 2. Crystal data

**Table S2.** Crystal data of **Pd1**.

|                                                      |                                                                               |
|------------------------------------------------------|-------------------------------------------------------------------------------|
| Empirical formula                                    | C <sub>50</sub> H <sub>42</sub> N <sub>4</sub> Pd                             |
| Formula weight                                       | 805.27                                                                        |
| Temperature/K                                        | 300.00                                                                        |
| Crystal system                                       | monoclinic                                                                    |
| Space group                                          | P21/n                                                                         |
| a/Å                                                  | 15.6620(7)                                                                    |
| b/Å                                                  | 12.2502(5)                                                                    |
| c/Å                                                  | 42.765(2)                                                                     |
| α/°                                                  | 90                                                                            |
| β/°                                                  | 93.497(3)                                                                     |
| γ/°                                                  | 90                                                                            |
| Volume/Å <sup>3</sup>                                | 8189.7(6)                                                                     |
| Z                                                    | 8                                                                             |
| ρ <sub>calc</sub> /cm <sup>3</sup>                   | 1.306                                                                         |
| μ/mm <sup>-1</sup>                                   | 3.948                                                                         |
| F(000)                                               | 3328.0                                                                        |
| Crystal size/mm <sup>3</sup>                         | 0.1 × 0.09 × 0.08                                                             |
| Radiation                                            | CuKα (λ = 1.54178)                                                            |
| 2θ range for data collection/°                       | 5.9 to 127.37                                                                 |
| Index ranges                                         | -18 ≤ h ≤ 18, -14 ≤ k ≤ 14, -49 ≤ l ≤ 49                                      |
| Reflections collected                                | 94131                                                                         |
| Independent reflections                              | 13456 [ <i>R</i> <sub>int</sub> = 0.1974, <i>R</i> <sub>sigma</sub> = 0.1044] |
| Data/restraints/parameters                           | 13456/1887/1282                                                               |
| Goodness-of-fit on <i>F</i> <sup>2</sup>             | 1.373                                                                         |
| Final <i>R</i> indexes [ <i>I</i> >= 2σ( <i>I</i> )] | <i>R</i> <sub>1</sub> = 0.1578, <i>wR</i> <sub>2</sub> = 0.3885               |
| Final <i>R</i> indexes [all data]                    | <i>R</i> <sub>1</sub> = 0.2393, <i>wR</i> <sub>2</sub> = 0.4709               |
| Largest diff. peak/hole / e Å <sup>-3</sup>          | 3.30/-1.01                                                                    |

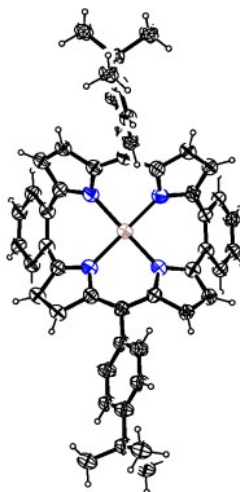

**Figure S9** Crystal structure of **Pd1**. The thermal ellipsoids represent for 30% probability.

**Table S3.** Crystal data of **Pd4**.

|                   |                                                                   |
|-------------------|-------------------------------------------------------------------|
| Empirical formula | C <sub>56</sub> H <sub>32</sub> F <sub>10</sub> N <sub>4</sub> Pd |
|-------------------|-------------------------------------------------------------------|

|                                             |                                                   |
|---------------------------------------------|---------------------------------------------------|
| Formula weight                              | 1057.25                                           |
| Temperature/K                               | 193.00                                            |
| Crystal system                              | monoclinic                                        |
| Space group                                 | C2/c                                              |
| a/Å                                         | 26.8686(7)                                        |
| b/Å                                         | 23.8617(6)                                        |
| c/Å                                         | 14.1565(4)                                        |
| $\alpha$ /°                                 | 90                                                |
| $\beta$ /°                                  | 103.2470(10)                                      |
| $\gamma$ /°                                 | 90                                                |
| Volume/Å <sup>3</sup>                       | 8834.7(4)                                         |
| Z                                           | 8                                                 |
| $\rho$ calc/cm <sup>3</sup>                 | 1.590                                             |
| $\mu$ /mm <sup>-1</sup>                     | 0.509                                             |
| F(000)                                      | 4256.0                                            |
| Crystal size/mm <sup>3</sup>                | 0.12 × 0.1 × 0.09                                 |
| Radiation                                   | MoK $\alpha$ ( $\lambda$ = 0.71073)               |
| 2 $\theta$ range for data collection/°      | 4.516 to 54.978                                   |
| Index ranges                                | -34 ≤ h ≤ 34, -30 ≤ k ≤ 30, -18 ≤ l ≤ 18          |
| Reflections collected                       | 81308                                             |
| Independent reflections                     | 10138 [ $R_{int}$ = 0.1209, $R_{sigma}$ = 0.0611] |
| Data/restraints/parameters                  | 10138/0/642                                       |
| Goodness-of-fit on $F^2$                    | 1.064                                             |
| Final $R$ indexes [ $I \geq 2\sigma(I)$ ]   | $R_1$ = 0.0428, $wR_2$ = 0.0828                   |
| Final $R$ indexes [all data]                | $R_1$ = 0.0679, $wR_2$ = 0.1011                   |
| Largest diff. peak/hole / e Å <sup>-3</sup> | 0.50/-0.49                                        |

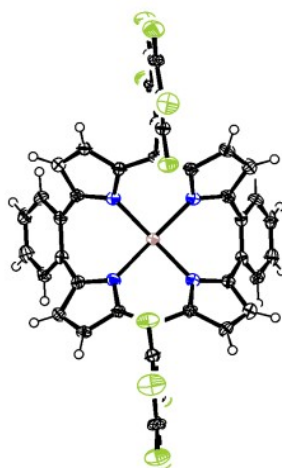

**Figure S10.** Crystal structure of **Pd4**. The thermal ellipsoids represent for 50% probability.

### 3. Cartesian coordinates

**Pd1** at ground state

Total energy: E = -2275.06544807 a.u.

|   |            |             |            |
|---|------------|-------------|------------|
| C | 1.42180800 | -1.63112400 | 2.70345100 |
|---|------------|-------------|------------|

|    |             |             |             |
|----|-------------|-------------|-------------|
| C  | -1.61470300 | -1.71244100 | 2.59507900  |
| N  | -1.48898900 | -1.21965200 | 1.35607400  |
| C  | -2.50849600 | -0.29901600 | 1.16900800  |
| C  | -3.26491600 | -0.20630000 | 2.37117200  |
| C  | -2.71954500 | -1.10910200 | 3.25393900  |
| C  | 2.38881400  | -0.91387800 | 3.45635200  |
| C  | 2.98053600  | -0.01796400 | 2.59494800  |
| C  | 2.40991300  | -0.24516400 | 1.31108500  |
| N  | 1.42510600  | -1.21671900 | 1.43013500  |
| C  | 0.61335300  | -2.73827200 | 3.22916900  |
| C  | -0.79178200 | -2.78031800 | 3.17241600  |
| N  | 1.48899000  | -1.21965900 | -1.35607200 |
| C  | 2.50849700  | -0.29902200 | -1.16901000 |
| C  | 3.26491700  | -0.20631100 | -2.37117400 |
| C  | 2.71954600  | -1.10911600 | -3.25393800 |
| C  | -2.38881300 | -0.91389100 | -3.45635100 |
| C  | -2.98053500 | -0.01797300 | -2.59495100 |
| C  | -2.40991300 | -0.24516900 | -1.31108700 |
| N  | -1.42510600 | -1.21672500 | -1.43013300 |
| C  | -1.42180800 | -1.63113400 | -2.70344700 |
| C  | 1.61470300  | -1.71245200 | -2.59507500 |
| C  | -1.29663200 | -3.76436300 | -3.89649200 |
| C  | -0.61335300 | -2.73828500 | -3.22916100 |
| C  | 0.79178200  | -2.78033100 | -3.17240800 |
| C  | 1.46310100  | -3.85027500 | -3.78128900 |
| C  | -2.89441900 | 0.21969100  | -0.07833600 |
| C  | 2.89442000  | 0.21969000  | 0.07833200  |
| C  | -3.97893800 | 1.23407300  | -0.07323300 |
| C  | 3.97893900  | 1.23407200  | 0.07322600  |
| C  | -0.61883700 | -4.82571400 | -4.48178800 |
| C  | 0.77174900  | -4.86940000 | -4.42242700 |
| C  | -3.77770300 | 2.46563500  | 0.56241800  |
| C  | -4.77878500 | 3.42707700  | 0.57779400  |
| C  | -6.02713300 | 3.20145700  | -0.01896500 |
| C  | -6.22463300 | 1.96129900  | -0.63215300 |
| C  | -5.22184600 | 0.99539300  | -0.66335600 |
| C  | 5.22184400  | 0.99539600  | 0.66335600  |
| C  | 6.22463100  | 1.96130200  | 0.63215300  |
| C  | 6.02713400  | 3.20145500  | 0.01895400  |
| C  | 4.77878900  | 3.42707200  | -0.57781200 |
| C  | 3.77770600  | 2.46563000  | -0.56243200 |
| C  | 7.10205900  | 4.28920100  | -0.02209400 |
| C  | -1.46310100 | -3.85025900 | 3.78130100  |
| C  | -0.77175000 | -4.86938200 | 4.42244300  |
| C  | 0.61883600  | -4.82569700 | 4.48180400  |
| C  | 1.29663200  | -3.76434700 | 3.89650300  |
| Pd | 0.00000000  | -1.38167000 | 0.00000100  |
| C  | -7.10206000 | 4.28920000  | 0.02208600  |
| C  | -7.42988200 | 4.62910200  | 1.48521100  |
| C  | -6.57744600 | 5.54755400  | -0.68860900 |

|   |             |             |             |
|---|-------------|-------------|-------------|
| C | -8.39620600 | 3.85345700  | -0.67000000 |
| C | 8.39615800  | 3.85351000  | 0.67011200  |
| C | 7.42998400  | 4.62901300  | -1.48521600 |
| C | 6.57738600  | 5.54759700  | 0.68848500  |
| H | -4.13385300 | 0.42084000  | 2.51553500  |
| H | -3.03810000 | -1.33122400 | 4.26400800  |
| H | 2.58271200  | -1.05223400 | 4.51198500  |
| H | 3.75397200  | 0.70228700  | 2.82136300  |
| H | 4.13385500  | 0.42082800  | -2.51554000 |
| H | 3.03810100  | -1.33124300 | -4.26400600 |
| H | -2.58271200 | -1.05225100 | -4.51198400 |
| H | -3.75397000 | 0.70227800  | -2.82136900 |
| H | -2.38152500 | -3.72019200 | -3.94047400 |
| H | 2.54842100  | -3.87456300 | -3.73411600 |
| H | -1.17438000 | -5.61462900 | -4.98126000 |
| H | 1.31698500  | -5.69337100 | -4.87442500 |
| H | -2.82121600 | 2.66794500  | 1.03691400  |
| H | -4.57822300 | 4.37578200  | 1.06926800  |
| H | -7.17811700 | 1.72728200  | -1.09414100 |
| H | -5.41334100 | 0.03458500  | -1.13302800 |
| H | 5.41333700  | 0.03459000  | 1.13303400  |
| H | 7.17811400  | 1.72728800  | 1.09414500  |
| H | 4.57822700  | 4.37577500  | -1.06929000 |
| H | 2.82122000  | 2.66793800  | -1.03693200 |
| H | -2.54842200 | -3.87454700 | 3.73412800  |
| H | -1.31698700 | -5.69335100 | 4.87444400  |
| H | 1.17437900  | -5.61461000 | 4.98127800  |
| H | 2.38152400  | -3.72017700 | 3.94048600  |
| H | -8.19363700 | 5.41505300  | 1.52988800  |
| H | -7.81350800 | 3.74991800  | 2.01503000  |
| H | -6.54900600 | 4.98912500  | 2.02715300  |
| H | -7.33466200 | 6.34068200  | -0.66349400 |
| H | -6.34043000 | 5.33482500  | -1.73710400 |
| H | -5.67079200 | 5.93616500  | -0.21271000 |
| H | -8.23370100 | 3.62320800  | -1.72921900 |
| H | -8.84011100 | 2.97367500  | -0.18985400 |
| H | -9.13133000 | 4.66435300  | -0.61722400 |
| H | 9.13131100  | 4.66437600  | 0.61726200  |
| H | 8.23359800  | 3.62340900  | 1.72935400  |
| H | 8.84005600  | 2.97364900  | 0.19010400  |
| H | 8.19375100  | 5.41495300  | -1.52988700 |
| H | 6.54915100  | 4.98901300  | -2.02724200 |
| H | 7.81363800  | 3.74979400  | -2.01495600 |
| H | 6.34031300  | 5.33493700  | 1.73698100  |
| H | 7.33459000  | 6.34073400  | 0.66335700  |
| H | 5.67075200  | 5.93615900  | 0.21250800  |

**Pd2** at ground stateTotal energy:  $E = -1960.98570657$  a.u.

|    |             |             |             |
|----|-------------|-------------|-------------|
| C  | 1.57191000  | -2.62139800 | -0.86723000 |
| C  | -1.46606900 | -2.68062000 | -0.78365400 |
| N  | -1.44723800 | -1.40741700 | -0.37001300 |
| C  | -2.42941400 | -1.27134600 | 0.60181600  |
| C  | -3.02246300 | -2.54493600 | 0.82969400  |
| C  | -2.44570200 | -3.41669600 | -0.06567900 |
| C  | 2.66506900  | -3.29850700 | -0.26252800 |
| C  | 3.22416000  | -2.42473800 | 0.64037500  |
| C  | 2.48813700  | -1.21007200 | 0.54572800  |
| N  | 1.46667500  | -1.38011200 | -0.37583300 |
| C  | 0.73893700  | -3.18661200 | -1.93383000 |
| C  | -0.66688100 | -3.22078200 | -1.89054100 |
| N  | 1.44723000  | 1.40742100  | -0.36999700 |
| C  | 2.42940800  | 1.27134700  | 0.60183000  |
| C  | 3.02244900  | 2.54493800  | 0.82971800  |
| C  | 2.44568900  | 3.41670000  | -0.06565200 |
| C  | -2.66506300 | 3.29852100  | -0.26250000 |
| C  | -3.22415600 | 2.42474400  | 0.64039300  |
| C  | -2.48814300 | 1.21007400  | 0.54572700  |
| N  | -1.46668400 | 1.38011900  | -0.37583900 |
| C  | -1.57191300 | 2.62141200  | -0.86721600 |
| C  | 1.46605900  | 2.68062600  | -0.78363300 |
| C  | -0.73894100 | 3.18662900  | -1.93381600 |
| C  | 0.66687700  | 3.22079200  | -1.89052300 |
| C  | -2.89248600 | -0.03038900 | 1.06557600  |
| C  | 2.89248200  | 0.03038800  | 1.06558300  |
| C  | -3.97451300 | -0.00613600 | 2.08435800  |
| C  | 3.97451500  | 0.00612600  | 2.08435700  |
| C  | -3.74334300 | 0.61725200  | 3.31650300  |
| C  | -4.73968200 | 0.65414300  | 4.28681200  |
| C  | -5.98494800 | 0.08476700  | 4.03337800  |
| C  | -6.22973200 | -0.52107200 | 2.80361900  |
| C  | -5.23170300 | -0.56896300 | 1.83529500  |
| C  | 3.74336200  | -0.61728900 | 3.31649200  |
| C  | 4.73971000  | -0.65419400 | 4.28679100  |
| C  | 5.98497000  | -0.08480400 | 4.03335700  |
| C  | 6.22973800  | 0.52106200  | 2.80360800  |
| C  | 5.23170000  | 0.56896600  | 1.83529400  |
| Pd | -0.00000400 | 0.00000200  | -0.53728800 |
| C  | 1.36161700  | 3.87851500  | -2.91501800 |
| C  | 0.69404000  | 4.47567600  | -3.97591800 |
| C  | -0.69710600 | 4.43873000  | -4.02079000 |
| C  | -1.39960100 | 3.80777900  | -3.00325400 |
| C  | -1.36161500 | -3.87850900 | -2.91503800 |
| C  | -0.69403300 | -4.47566700 | -3.97593700 |
| C  | 0.69711200  | -4.43871200 | -4.02080600 |
| C  | 1.39960100  | -3.80775800 | -3.00326800 |
| H  | -3.79952100 | -2.75704900 | 1.54975300  |

|   |             |             |             |
|---|-------------|-------------|-------------|
| H | -2.65810800 | -4.46808600 | -0.20425100 |
| H | 2.96671600  | -4.31320400 | -0.48409200 |
| H | 4.08882500  | -2.58287200 | 1.26930600  |
| H | 3.79950600  | 2.75705000  | 1.54978000  |
| H | 2.65809500  | 4.46809100  | -0.20421800 |
| H | -2.96670300 | 4.31322400  | -0.48405100 |
| H | -4.08881900 | 2.58287400  | 1.26932900  |
| H | -2.77236000 | 1.06437500  | 3.50870700  |
| H | -4.54210400 | 1.13107900  | 5.24250900  |
| H | -6.76411000 | 0.11809600  | 4.78942200  |
| H | -7.20381200 | -0.95337300 | 2.59319500  |
| H | -5.42688000 | -1.02641000 | 0.87003000  |
| H | 2.77238200  | -1.06442100 | 3.50869700  |
| H | 4.54214300  | -1.13115000 | 5.24248100  |
| H | 6.76413900  | -0.11814500 | 4.78939300  |
| H | 7.20381300  | 0.95337200  | 2.59318400  |
| H | 5.42686600  | 1.02643100  | 0.87003600  |
| H | 2.44659000  | 3.90551700  | -2.86925700 |
| H | 1.25777700  | 4.96729200  | -4.76331600 |
| H | -1.23397600 | 4.90055300  | -4.84419700 |
| H | -2.48514600 | 3.77857900  | -3.02771200 |
| H | -2.44658700 | -3.90551700 | -2.86927900 |
| H | -1.25776700 | -4.96728500 | -4.76333500 |
| H | 1.23398700  | -4.90053200 | -4.84421200 |
| H | 2.48514600  | -3.77855200 | -3.02772500 |

**Pd3** at ground state

Total energy: E = -2456.66911855 a.u.

|    |             |             |             |
|----|-------------|-------------|-------------|
| C  | 2.76072600  | -1.37594300 | 4.45401000  |
| C  | 2.40040300  | -2.33682600 | 5.38931100  |
| C  | 1.06728800  | -2.72274700 | 5.50105800  |
| C  | 0.11380700  | -2.14143100 | 4.67642300  |
| C  | 0.09397700  | -4.36409300 | -2.70993200 |
| C  | 1.03117400  | -5.32960200 | -3.05123000 |
| C  | 2.37586400  | -4.97996200 | -3.14220200 |
| C  | 2.76299100  | -3.67076500 | -2.89107900 |
| Pd | 0.77501300  | -0.66062400 | 0.19809200  |
| F  | -4.91263800 | -1.37989000 | -0.11055200 |
| F  | -7.29707100 | -0.16583900 | -0.42865100 |
| F  | -7.42538500 | 2.53426800  | -0.67762300 |
| F  | -5.15459500 | 4.02066600  | -0.60787300 |
| F  | -2.76303600 | 2.81512700  | -0.29561500 |
| C  | 3.33001800  | 3.68199700  | -1.77777600 |
| C  | 4.03520100  | 4.81551400  | -2.16964200 |
| C  | 5.31859200  | 5.04549100  | -1.68063000 |
| C  | 5.89467200  | 4.13590000  | -0.79741200 |
| C  | 5.18787400  | 3.00696900  | -0.39525000 |



|   |             |             |             |
|---|-------------|-------------|-------------|
| C | -3.86068000 | 2.06588100  | -0.32353500 |
| C | -5.08685700 | 2.69950500  | -0.48640600 |
| C | -6.24992100 | 1.93971700  | -0.52286400 |
| C | -6.18251500 | 0.55716300  | -0.39793700 |
| C | -4.94599700 | -0.05656600 | -0.23669900 |
| C | 3.89473600  | 2.77173500  | -0.87646700 |
| C | -3.76442200 | 0.68101800  | -0.20005600 |
| C | 3.12340700  | 1.56587700  | -0.47606800 |
| C | -2.43597700 | 0.03420900  | -0.01697500 |
| C | 1.83111700  | -2.68785100 | -2.52807400 |
| C | 0.47246300  | -3.04234400 | -2.43523400 |
| C | 2.33429200  | -1.31990500 | -2.36300700 |
| C | -0.60456700 | -2.08882600 | -2.14799900 |
| N | -0.66817500 | -1.29872300 | -1.07056600 |
| C | -1.88976800 | -0.64419500 | -1.11015600 |
| C | -2.57379200 | -1.01780500 | -2.30122400 |
| C | -1.78331600 | -1.94690800 | -2.93334700 |
| C | 3.20253000  | -0.67275400 | -3.28263300 |
| C | 3.50743200  | 0.55627900  | -2.74572600 |
| C | 2.85098900  | 0.62780600  | -1.48533800 |
| N | 2.12119500  | -0.53553600 | -1.29807800 |
| C | 0.46597800  | -1.18362700 | 3.71521100  |
| C | 1.81275800  | -0.79424900 | 3.60094000  |
| N | 2.13579100  | 0.27329400  | 1.37001100  |
| C | 2.82460600  | 1.37598700  | 0.88173500  |
| C | 3.35922500  | 2.10173400  | 1.98270900  |
| C | 3.05467000  | 1.38375900  | 3.11653900  |
| C | -1.82497300 | -0.06950000 | 3.51350700  |
| C | -2.61282600 | 0.35161300  | 2.46955600  |
| C | -1.89963700 | 0.05238700  | 1.27472200  |
| N | -0.66917600 | -0.48998100 | 1.60964100  |
| C | -0.62300700 | -0.57606800 | 2.94402700  |
| C | 2.28565700  | 0.26486600  | 2.70069400  |
| H | 3.79746900  | -1.06454800 | 4.36426200  |
| H | 3.15744000  | -2.78099000 | 6.02885100  |
| H | 0.77016900  | -3.47246000 | 6.22836500  |
| H | -0.92909500 | -2.43347800 | 4.75968700  |
| H | -0.95758400 | -4.62722100 | -2.63962400 |
| H | 0.71255200  | -6.34947400 | -3.24523100 |
| H | 3.12125000  | -5.72358000 | -3.40834100 |
| H | 3.80956600  | -3.38935700 | -2.96344800 |
| H | 2.33028400  | 3.49722800  | -2.15995800 |
| H | 3.58020900  | 5.51957000  | -2.86034600 |
| H | 5.87027800  | 5.92813200  | -1.99105600 |
| H | 6.90113500  | 4.30138400  | -0.42382700 |
| H | 5.64231500  | 2.28834900  | 0.28019500  |
| H | -3.54845200 | -0.66290800 | -2.60585200 |
| H | -1.98146600 | -2.47475400 | -3.85610700 |
| H | 3.53427400  | -1.09122900 | -4.22308400 |
| H | 4.16086000  | 1.31502800  | -3.15238600 |

|   |             |             |            |
|---|-------------|-------------|------------|
| H | 3.92240200  | 3.02124200  | 1.91521900 |
| H | 3.31381700  | 1.61328200  | 4.14115400 |
| H | -2.04025100 | -0.02524200 | 4.57232000 |
| H | -3.60586400 | 0.77669100  | 2.51947200 |

**Pd4** at ground state

Total energy: E = -2952.35196839 a.u.

|   |             |             |             |
|---|-------------|-------------|-------------|
| C | -1.51644400 | 1.46773700  | 2.66048400  |
| C | 1.52592400  | 1.44282000  | 2.65519400  |
| N | 1.45880300  | 1.00318500  | 1.39334300  |
| C | 2.45739400  | 0.05421500  | 1.23345600  |
| C | 3.12534600  | -0.12484700 | 2.47738700  |
| C | 2.56378500  | 0.76821800  | 3.35753600  |
| C | -2.57647100 | 0.82687800  | 3.36046700  |
| C | -3.14721900 | -0.06743200 | 2.48688700  |
| C | -2.45734600 | 0.07418400  | 1.25048200  |
| N | -1.44452000 | 1.00657400  | 1.40594100  |
| C | -0.68949800 | 2.54287300  | 3.21861000  |
| C | 0.71754000  | 2.52991300  | 3.21828500  |
| N | -1.45880300 | 1.00318700  | -1.39334200 |
| C | -2.45739400 | 0.05421700  | -1.23345600 |
| C | -3.12534500 | -0.12484500 | -2.47738800 |
| C | -2.56378500 | 0.76822100  | -3.35753600 |
| C | 2.57647100  | 0.82688100  | -3.36046600 |
| C | 3.14721800  | -0.06743000 | -2.48688700 |
| C | 2.45734600  | 0.07418500  | -1.25048200 |
| N | 1.44452000  | 1.00657500  | -1.40594000 |
| C | 1.51644400  | 1.46773900  | -2.66048200 |
| C | -1.52592400 | 1.44282300  | -2.65519200 |
| C | 0.68949800  | 2.54287700  | -3.21860700 |
| C | -0.71754000 | 2.52991700  | -3.21828200 |
| C | 2.88269200  | -0.41684400 | -0.01169400 |
| C | -2.88269200 | -0.41684300 | 0.01169400  |
| C | 3.97150000  | -1.43182500 | -0.03185500 |
| C | -3.97150000 | -1.43182400 | 0.03185400  |
| C | 5.30243800  | -1.09119800 | 0.20024200  |
| C | 6.31381600  | -2.04392200 | 0.16775900  |
| C | 5.99737000  | -3.36947700 | -0.10537200 |
| C | 4.67801900  | -3.73559400 | -0.34367800 |
| C | 3.68195100  | -2.76692300 | -0.30752400 |
| C | -3.68195100 | -2.76692200 | 0.30752400  |
| C | -4.67801900 | -3.73559300 | 0.34367700  |
| C | -5.99737000 | -3.36947700 | 0.10536900  |
| C | -6.31381600 | -2.04392200 | -0.16776300 |
| C | -5.30243800 | -1.09119800 | -0.20024600 |
| F | -6.95544800 | -4.28571700 | 0.13814700  |
| F | 2.42802900  | -3.14335500 | -0.53532600 |

|    |             |             |             |
|----|-------------|-------------|-------------|
| F  | 4.37893200  | -5.00342500 | -0.60250400 |
| F  | 6.95544800  | -4.28571700 | -0.13815200 |
| F  | 7.57689100  | -1.69628300 | 0.38998200  |
| F  | 5.63455300  | 0.17116000  | 0.45440100  |
| F  | -4.37893300 | -5.00342400 | 0.60250500  |
| F  | -2.42803000 | -3.14335400 | 0.53532800  |
| F  | -5.63455300 | 0.17116000  | -0.45440600 |
| F  | -7.57689100 | -1.69628300 | -0.38998900 |
| Pd | 0.00000000  | 1.16787800  | 0.00000100  |
| C  | -1.40609000 | 3.56577200  | -3.86486400 |
| C  | -0.73007700 | 4.60820700  | -4.48420900 |
| C  | 0.66218000  | 4.62169800  | -4.48369100 |
| C  | 1.35798700  | 3.59236000  | -3.86453200 |
| C  | 1.40609100  | 3.56576800  | 3.86486800  |
| C  | 0.73007800  | 4.60820100  | 4.48421400  |
| C  | -0.66217900 | 4.62169300  | 4.48369600  |
| C  | -1.35798600 | 3.59235500  | 3.86453600  |
| H  | 3.94566400  | -0.80489200 | 2.66010900  |
| H  | 2.82487800  | 0.93848900  | 4.39301000  |
| H  | -2.84687100 | 1.01994100  | 4.38954400  |
| H  | -3.99127300 | -0.71948000 | 2.66464100  |
| H  | -3.94566300 | -0.80488900 | -2.66011100 |
| H  | -2.82487700 | 0.93849300  | -4.39301000 |
| H  | 2.84687100  | 1.01994500  | -4.38954300 |
| H  | 3.99127200  | -0.71947800 | -2.66464200 |
| H  | -2.49209800 | 3.54549700  | -3.86397800 |
| H  | -1.28838000 | 5.40552400  | -4.96567000 |
| H  | 1.20519900  | 5.42983500  | -4.96462000 |
| H  | 2.44416400  | 3.59324200  | -3.86325800 |
| H  | 2.49209800  | 3.54549200  | 3.86398200  |
| H  | 1.28838000  | 5.40551800  | 4.96567600  |
| H  | -1.20519800 | 5.42982900  | 4.96462600  |
| H  | -2.44416400 | 3.59323700  | 3.86326200  |
